# Supplementary material for: Functionalized Ultrasmall Iron Oxide Nanoparticles for T1-Weighted Magnetic Resonance Imaging of Tumor Hypoxia
Source: MDPI journal article supplement (doi:10.3390/molecules27206929), 2022-10-15
Supplement: s1 [file s1]

## Supplementary Materials

# Functionalized Ultrasmall Iron Oxide Nanoparticles for $T_1$ -Weighted Magnetic Resonance Imaging of Tumor Hypoxia

Lei Yang <sup>1</sup>, Mohammad Javad Afshari <sup>2</sup>, Jianxian Ge <sup>2</sup>, Dandan Kou <sup>2</sup>, Lei Chen <sup>2</sup>, Dandan Zhou <sup>2</sup>, Cang Li <sup>2</sup>, Shuwang Wu <sup>2</sup>, Leshuai Zhang <sup>2</sup>, Jianfeng Zeng <sup>2,\*</sup>, Jian Zhong <sup>1</sup>, Roland H. Stauber <sup>3</sup> and Mingyuan Gao <sup>1,2,\*</sup>

<sup>1</sup> College of Food Science & Technology, Shanghai Ocean University, Shanghai 201306, China

<sup>2</sup> Center for Molecular Imaging and Nuclear Medicine, State Key Laboratory of Radiation Medicine and Protection, School for Radiological and Interdisciplinary Sciences (RAD-X), Collaborative Innovation Center of Radiological Medicine of Jiangsu Higher Education Institutions, Soochow University, Suzhou 215123, China

<sup>3</sup> Department of Nanobiomedicine, ENT, University Medical Center of Mainz, Langenbeckstr. 1, 55101 Mainz, Germany

\* Correspondence: jfzeng@suda.edu.cn (J.Z.); gaomy@iccas.ac.cn (M.G.)

**Hydrodynamic Size, Zeta, Potential and Stability of the Nanoprobes.** The  $\text{Fe}_3\text{O}_4$ -Met-Cy5.5 and  $\text{Fe}_3\text{O}_4$ -Cys-Cy5.5 were diluted to  $50 \mu\text{g mL}^{-1}$  (based on Fe content) with HEPES buffer (pH=7.4, 10 mM). The hydrodynamic size and zeta potential were measured by the Malvern Zetasizer Nano ZS90. The  $\text{Fe}_3\text{O}_4$ -Met-Cy5.5 and  $\text{Fe}_3\text{O}_4$ -Cys-Cy5.5 were diluted to  $50 \mu\text{g mL}^{-1}$  (based on Fe content) with PBS or ultra-pure water. The colloidal stability was assessed by measuring the hydrodynamic size of  $\text{Fe}_3\text{O}_4$ -Met-Cy5.5 and  $\text{Fe}_3\text{O}_4$ -Cys-Cy5.5 in PBS or ultra-pure water at different time points.

**Iron Concentration Test.** 20  $\mu\text{L}$  nanoparticles solution was first digested with 200  $\mu\text{L}$  concentrated hydrochloric acid. Then, 1 mL 10% hydroxylamine hydrochloride, 5 mL acetic acid buffer (pH=4.7, 1M), 2 mL 0.5% 1,10-phenanthroline solution were sequentially added. The mixture was volume up to 50 mL with ultra-pure water. The iron concentration was determined by the absorbance at 510 nm based on standard curve of iron obtained by the same method.

**Determination of the Number of Cy5.5 Moieties per  $\text{Fe}_3\text{O}_4$  Particle.** The absorbance of  $\text{Fe}_3\text{O}_4$ -Met,  $\text{Fe}_3\text{O}_4$ -Cys,  $\text{Fe}_3\text{O}_4$ -Met-Cy5.5, and  $\text{Fe}_3\text{O}_4$ -Cys-Cy5.5 solution with an iron concentration of  $50 \mu\text{g mL}^{-1}$  were determined by a UV-Vis spectrophotometer. The number of Cy5.5 on each  $\text{Fe}_3\text{O}_4$  nanoparticle can be calculated by the absorbance difference at 690 nm between  $\text{Fe}_3\text{O}_4$ -Met and  $\text{Fe}_3\text{O}_4$ -Met-Cy5.5 (or  $\text{Fe}_3\text{O}_4$ -Cys and  $\text{Fe}_3\text{O}_4$ -Cys-Cy5.5) solution based on the standard curve of Cy5.5 solution.

**Relaxation Properties Measurement.**  $\text{Fe}_3\text{O}_4$ -Met-Cy5.5 or  $\text{Fe}_3\text{O}_4$ -Cys-Cy5.5 were diluted to 0, 0.05, 0.1, 0.2, 0.3, 0.4, 0.5 mM with ultra-pure water and sealed in tubules. The  $T_1$ - and  $T_2$ -weighted images were acquired by a 3 T animal MRI scanner. The parameters were as follows.  $T_1$ -Weighted image: repetition time (TR) = 300 ms, echo time (TE) = 11 ms, field of view (FOV) = 40 mm×40 mm, Thickness = 2 mm;  $T_2$ -Weighted image: TR = 5000 ms, TE = 68 ms, FOV = 40 mm×40 mm, Thickness = 2 mm. The parameters for  $T_1$  measurements were set as follows: TE = 11 ms and TR = 200, 500, 1000, 1500, 2000, and 5000 ms. For  $T_2$  measurements, the parameters were set as TR = 1200 ms and TE = 20, 40, 60, 80 and 100 ms.

**Western Blot Assay.** The protein was collected from MCF-7 cells incubated at 1%, 3%, and 21% O<sub>2</sub> for 12 h. The expression of HIF-1 $\alpha$  was measured by western blot assay as previously reported.<sup>1</sup>

**Fluorescence Imaging of Monolayer Cells and Multicellular Spheres.** The MCF-7 cell suspension was seeded to the confocal dishes (7 $\times$  10<sup>4</sup> cells per dish) for overnight incubation under 21% O<sub>2</sub>. Then dishes were separately placed under 1%, 3%, and 21% O<sub>2</sub> for 12 h. Subsequently, the cells were treated with Fe<sub>3</sub>O<sub>4</sub>-Met-Cy5.5 or Fe<sub>3</sub>O<sub>4</sub>-Cys-Cy5.5 (containing 15  $\mu$ g Fe) for 4 h and stained with Hoechst 33342 for 15 min. In the end, fluorescence imaging of monolayer cells was examined by the confocal microscope (FV1200, Olympus).

200  $\mu$ L MCF-7 cells with a density of 1000 cells mL<sup>-1</sup> were added into the low adsorption 96-well plate for 12 days. The multicellular spheres, nearly 300  $\mu$ m in diameter, were treated with Fe<sub>3</sub>O<sub>4</sub>-Met-Cy5.5 or Fe<sub>3</sub>O<sub>4</sub>-Cys-Cy5.5 (containing 50  $\mu$ g Fe) for 6 h. After washing with PBS three times, the images of multicellular spheres were acquired by the confocal microscope.

**Prussian Blue Staining *In vitro*.** The MCF-7 cell suspension was seeded to the 24-well plate (3 $\times$  10<sup>4</sup> cells per well) for overnight incubation under 21% O<sub>2</sub>. Then dishes were separately placed under 21% and 1% O<sub>2</sub> for 12 h. Subsequently, the cells were treated with Fe<sub>3</sub>O<sub>4</sub>-Met-Cy5.5 or Fe<sub>3</sub>O<sub>4</sub>-Cys-Cy5.5 (containing 50  $\mu$ g Fe) for 12 h under 21% and 1% O<sub>2</sub>, respectively. Then the cells were fixed with 4% paraformaldehyde for 30 min at room temperature and treated with the mixture solution of 4% potassium ferrocyanide and 12% HCl (volume ratio was 1:1) for 1 h at room temperature.

***In Vitro* Cytotoxicity Assay.** The suspension of MCF-7 cells were seeded to 96-well plates (6000 cells per well) and cultured under 21% O<sub>2</sub>. After removing the medium in the bottle, the prepared Fe<sub>3</sub>O<sub>4</sub>-Met-Cy5.5 or Fe<sub>3</sub>O<sub>4</sub>-Cys-Cy5.5 at different Fe concentration (0, 10, 20, 50, 100, 150, 200  $\mu$ g mL<sup>-1</sup>) with DMEM was added to plates respectively. Two plates of cells were incubated in 1% O<sub>2</sub> and the other two were in 21% O<sub>2</sub> for 24 h. Then 100  $\mu$ L CCK8 solution was added to each well and incubated for 1 h. The cytotoxicity was required by the absorbance of the CCK8 solution at 450 nm.

**The Assessment of MRI *In Vivo*.** At first, nude mice bearing MCF-7 tumors were scanned by a 3 T animal MRI scanner before injection. Then the T<sub>1</sub>-weighted MRI was performed at specific time points after the intravenous injection with nanoprobes (5.6 mg Fe kg<sup>-1</sup> bodyweight). The parameters were as follows: TR = 720 ms, TE = 11 ms, FOV = 40 mm  $\times$  40 mm, Thickness = 1 mm.

**Histopathology and Immunofluorescence Staining.** The main organs (heart, liver, spleen, lung, and kidney) and tumor tissues of mice were extracted and cut into slices after MRI. Then the organ tissues were stained by H&E for histopathological observation. The slices of tumor tissue were subjected to H&E staining, HIF-1 $\alpha$  staining, and Prussian blue staining respectively.

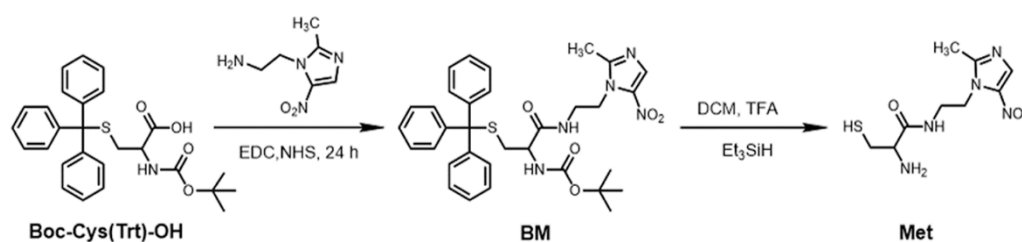

**Scheme S1.** Synthetic route of hypoxia-sensitive ligand (Met).

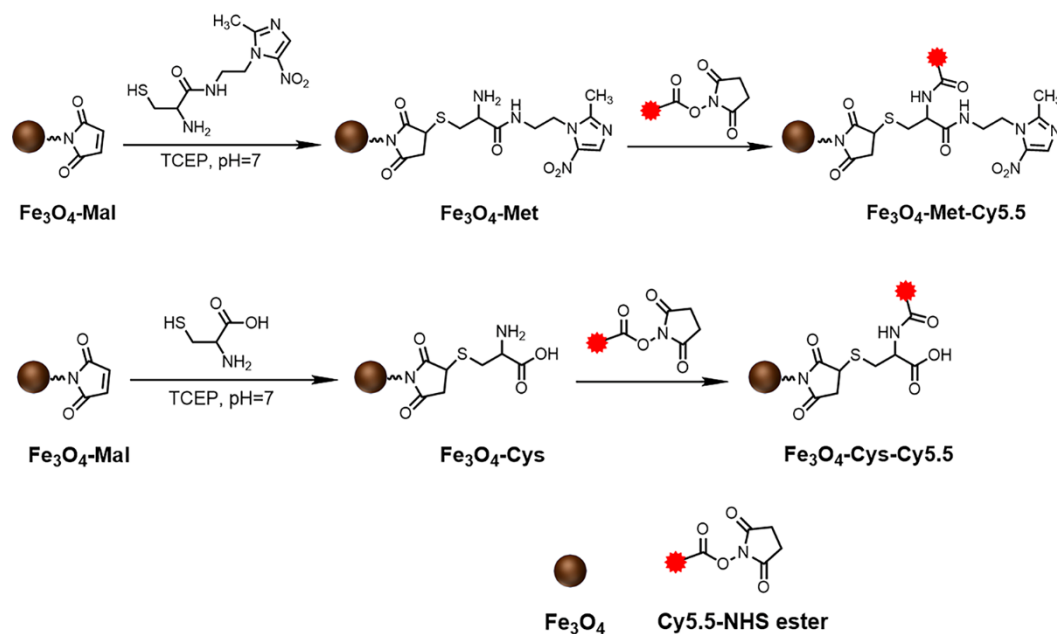

**Scheme S2.** Synthetic route of  $\text{Fe}_3\text{O}_4\text{-Met-Cy5.5}$  and  $\text{Fe}_3\text{O}_4\text{-Cys-Cy5.5}$ .

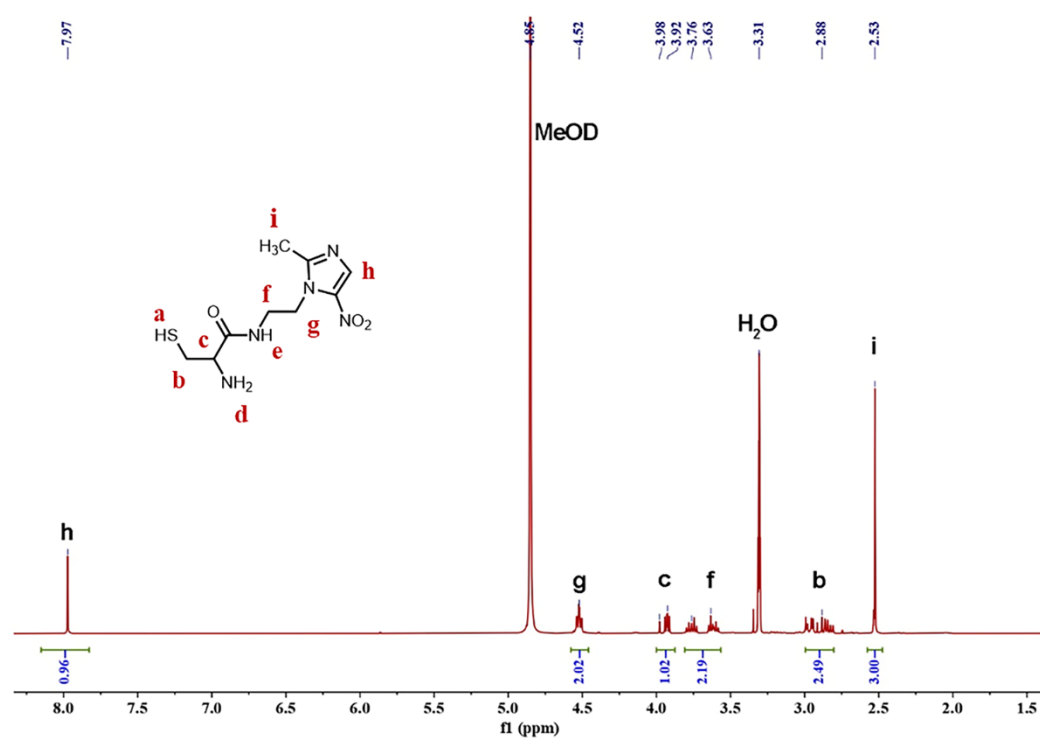

**Figure S1.**  $^1\text{H}$  NMR spectrum of hypoxia-sensitive ligand (Met).

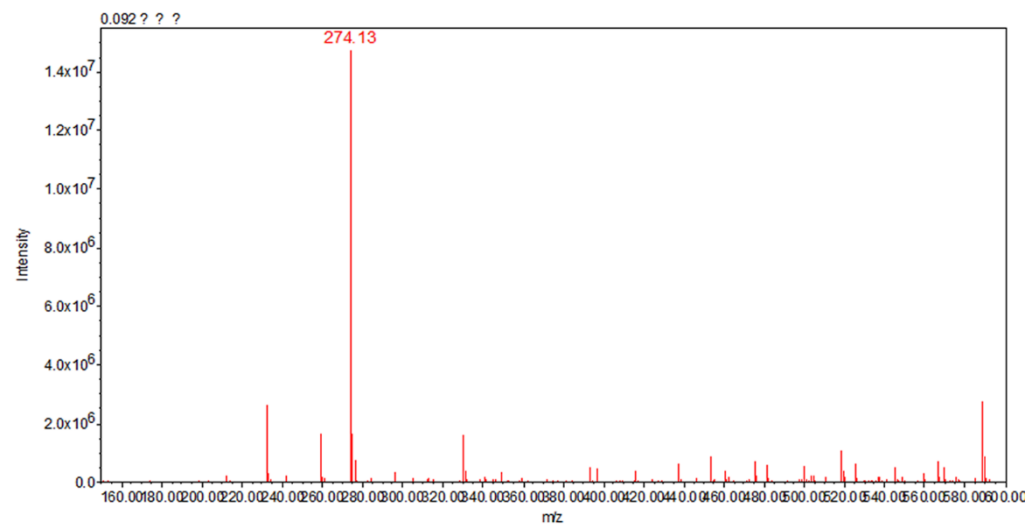

**Figure S2.** Mass spectrum of hypoxia-sensitive ligand (Met).

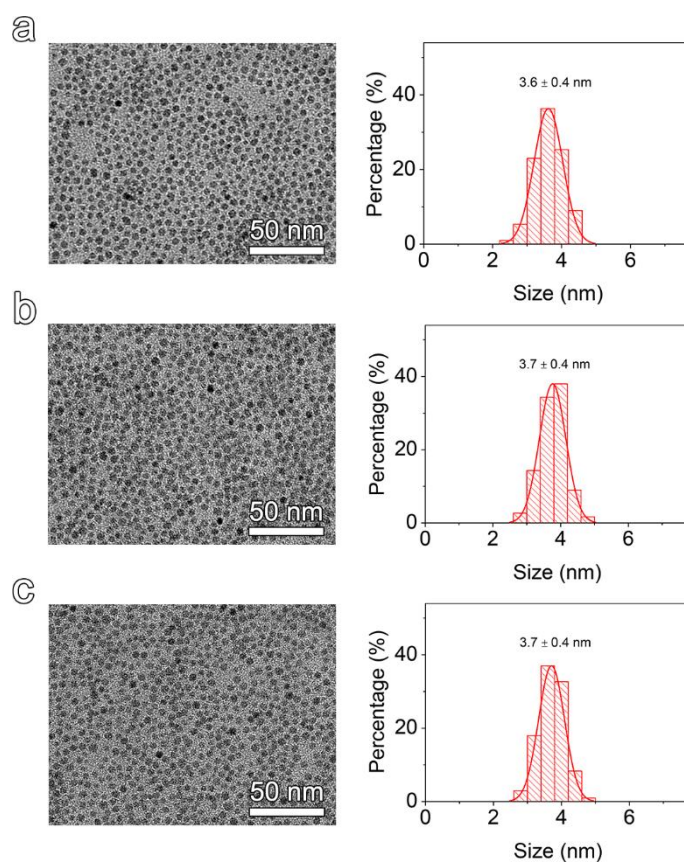

**Figure S3.** TEM images and the size distributions of  $\text{Fe}_3\text{O}_4$  (a),  $\text{Fe}_3\text{O}_4$ -Met-Cy5.5 (b), and  $\text{Fe}_3\text{O}_4$ -Cys-Cy5.5 (c) nanoparticles.

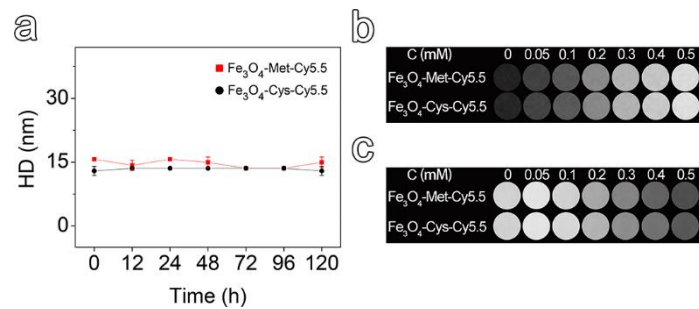

**Figure S4.** The evaluation of colloid stability for  $\text{Fe}_3\text{O}_4\text{-Met-Cy5.5}$  and  $\text{Fe}_3\text{O}_4\text{-Cys-Cy5.5}$  stored in water for 120 h (a).  $T_1$ -weighted (b) and  $T_2$ -weighted (c) MR images of the  $\text{Fe}_3\text{O}_4\text{-Met-Cy5.5}$  and  $\text{Fe}_3\text{O}_4\text{-Cys-Cy5.5}$  at different Fe concentrations (0, 0.05, 0.1, 0.2, 0.3, 0.4, 0.5 mM).

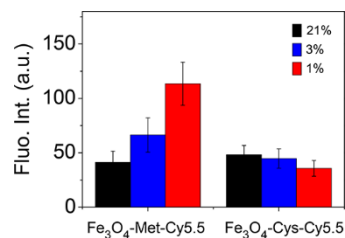

**Figure S5.** Semi-quantitative analysis of MCF-7 cells fluorescence imaging under three oxygen concentrations.

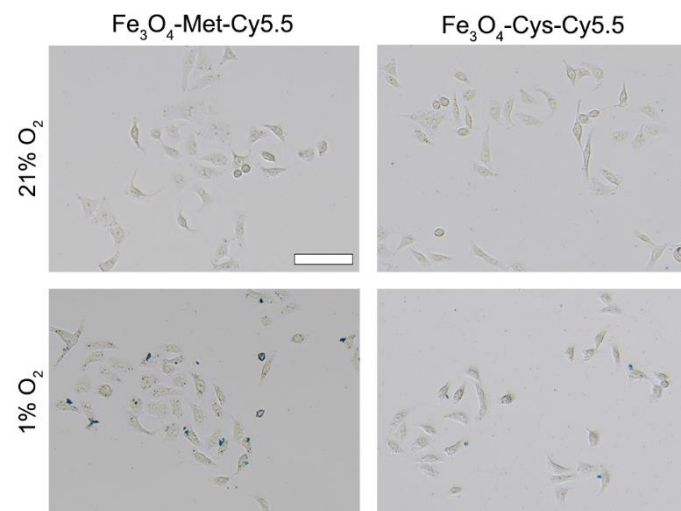

**Figure S6.** Prussian blue staining of MCF-7 cells incubated with  $\text{Fe}_3\text{O}_4\text{-Met-Cy5.5}$  or  $\text{Fe}_3\text{O}_4\text{-Cys-Cy5.5}$  probe at different oxygen concentrations for 12 h (scale bar represents 10  $\mu\text{m}$ ).

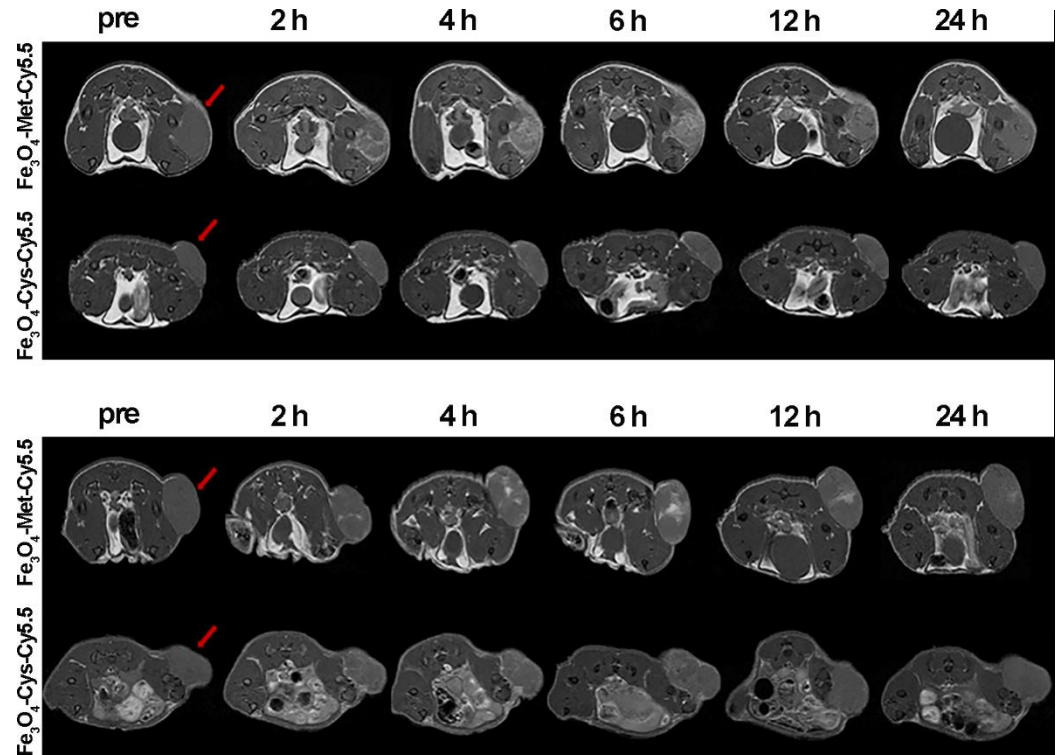

**Figure S7.**  $T_1$ -weighted MRI of two additional tumor-bearing mice for each group within 24 h before and after injection with  $\text{Fe}_3\text{O}_4$ -Met-Cy5.5 or  $\text{Fe}_3\text{O}_4$ -Cys-Cy5.5.

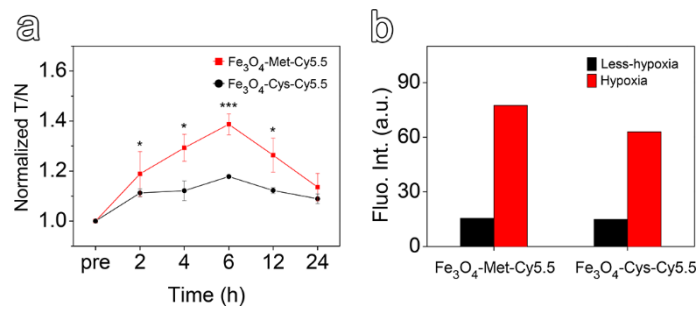

**Figure S8.** (a) The trend of MRI signal at different time points in tumors injected with  $\text{Fe}_3\text{O}_4$ -Met-Cy5.5 or  $\text{Fe}_3\text{O}_4$ -Cys-Cy5.5. (b) Semi-quantitative analysis of HIF-1 $\alpha$  expression of the less-hypoxic and hypoxic regions in tumors treated with  $\text{Fe}_3\text{O}_4$ -Met-Cy5.5 or  $\text{Fe}_3\text{O}_4$ -Cys-Cy5.5. \* $p < 0.05$ , \*\*\* $p < 0.001$ .



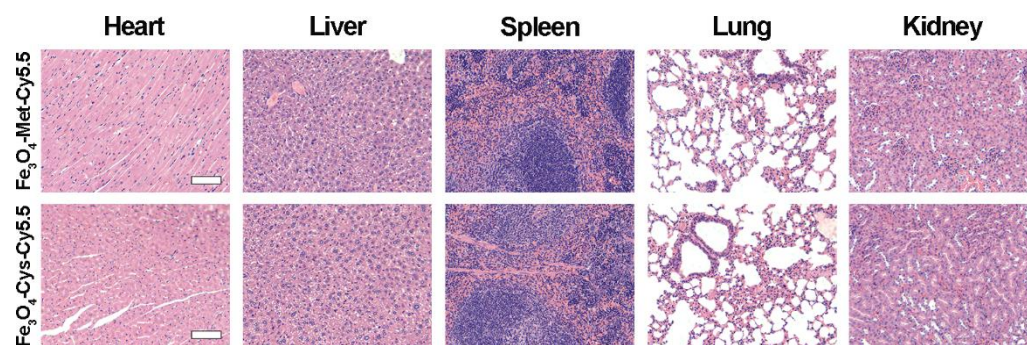

**Figure S9.** H&E staining of organ tissue (heart, liver, spleen, lung, and kidney) from mice harvested at 24 h after the injection of  $\text{Fe}_3\text{O}_4\text{-Met-Cy5.5}$  or  $\text{Fe}_3\text{O}_4\text{-Cys-Cy5.5}$  (scale bar represents 100  $\mu\text{m}$ ).

## References

1. Guo, S.; Sun, D.; Ni, D.; Yu, M.; Qian, K.; Zhang, W.; Yang, Y.; Song, S.; Li, Y.; Xi, Z.; Wang, J.; Li, J. y.; Wei, Y.; Chen, K.; Gan, Y.; Wang, Z., Smart Tumor Microenvironment-Responsive Nanotheranostic Agent for Effective Cancer Therapy. *Adv. Funct. Mater.* **2020**, *30* (17), 2000486.
